# Supplementary material
Source: PubMed Central journal article supplement (PMC8826179)
Supplement: jama-e220078-s002.pdf [file jama-e220078-s002.pdf]

## Supplemental Online Content

Dahl D, Onishi Y, Norwood P, et al. Effect of Subcutaneous Tirzepatide vs Placebo Added to Titrated Insulin Glargine on Glycemic Control in Patients With Type 2 Diabetes. *JAMA*. Published online February 8, 2022. doi:10.1001/jama.2022.0078

### Supplement 2. eAPPENDIX

**eTable 1.** Insulin glargine treat-to-target algorithm

**eTable 2.** Primary and secondary outcomes (efficacy estimand)

**eTable 3.** Number of patients assessed at each time point for HbA1c, fasting serum glucose and body weight over time (efficacy estimand)

**eTable 4.** Subgroup analysis of HbA1c at baseline HbA1c  $\leq 8.0\%$  or  $>8.0\%$

**eTable 5.** Subset analysis of daily mean insulin glargine dose by HbA1c at baseline

**eTable 6.** Fasting lipid profile

**eTable 7.** Vital signs and additional safety parameters

**eTable 8.** Prevalence of gastrointestinal TEAEs by maximum severity level

**eTable 9.** Hypoglycemia events through safety follow-up<sup>a</sup>

**eTable 10.** Malignant neoplasms reported during the study

**eFigure 1.** SURPASS-5 study design

**eFigure 2.** Secondary efficacy outcomes from efficacy estimand. (A) HbA1c change from baseline at week 40, (B) proportion of patients achieving HbA1c levels  $<7.0\%$ ,  $\leq 6.5\%$ , and  $<5.7\%$  at week 40, (C) proportion of patients achieving body weight loss

$\geq 5\%$ ,  $\geq 10\%$  and  $\geq 15\%$  at week 40 (D) mean 7-point SMBG profiles at baseline and at week 40

**eFigure 3.** Efficacy measures (treatment-regimen estimand). (A) body weight change from baseline to week 40; and (B) proportion of patients achieving body weight loss targets  $\geq 5\%$ ,  $\geq 10\%$ , and  $\geq 15\%$  at week 40

**eFigure 4.** Daily mean insulin glargine dose changes over time. (A) insulin glargine dose (IU/kg/day) percent change from baseline and (B) insulin glargine dose (IU/kg/day) change from baseline

**eFigure 5.** Fasting lipid profile at week 40

**eFigure 6.** Vital parameters (A) pulse rate (bpm), (B) systolic blood pressure (mmHg), and (C) diastolic blood pressure (mmHg)

**eFigure 7.** BMI and waist circumference over time and change from baseline

**eFigure 8.** Incidence of diarrhea, nausea, and vomiting over time

**eFigure 9.** Prevalence of (A) diarrhea, (B) nausea, and (C) vomiting over time

This supplemental material has been provided by the authors to give readers additional information about their work.

## Table of Contents

|                                                                                                                                                                                                                                                                                                                                                                                   |    |
|-----------------------------------------------------------------------------------------------------------------------------------------------------------------------------------------------------------------------------------------------------------------------------------------------------------------------------------------------------------------------------------|----|
| <b>eAPPENDIX</b> .....                                                                                                                                                                                                                                                                                                                                                            | 4  |
| <b>Inclusion Criteria</b> .....                                                                                                                                                                                                                                                                                                                                                   | 4  |
| <b>Exclusion criteria</b> .....                                                                                                                                                                                                                                                                                                                                                   | 5  |
| <b>Statistical analysis</b> .....                                                                                                                                                                                                                                                                                                                                                 | 6  |
| <b>Treatment-regimen estimand</b> .....                                                                                                                                                                                                                                                                                                                                           | 7  |
| <b>Efficacy estimand</b> .....                                                                                                                                                                                                                                                                                                                                                    | 7  |
| <b>Safety and other Measures</b> .....                                                                                                                                                                                                                                                                                                                                            | 8  |
| <b>Laboratory methods</b> .....                                                                                                                                                                                                                                                                                                                                                   | 8  |
| <b>Supplementary tables and figures</b> .....                                                                                                                                                                                                                                                                                                                                     | 9  |
| <b>eTable 1.</b> Insulin glargine treat-to-target algorithm.....                                                                                                                                                                                                                                                                                                                  | 9  |
| <b>eTable 2.</b> Primary and secondary outcomes (efficacy estimand).....                                                                                                                                                                                                                                                                                                          | 10 |
| <b>eTable 3.</b> Number of patients assessed at each time point for HbA <sub>1c</sub> , fasting serum glucose and body weight over time (efficacy estimand).....                                                                                                                                                                                                                  | 13 |
| <b>eTable 4.</b> Subgroup analysis of HbA <sub>1c</sub> at baseline HbA <sub>1c</sub> ≤8.0% or >8.0%.....                                                                                                                                                                                                                                                                         | 14 |
| <b>eTable 5.</b> Subset analysis of daily mean insulin glargine dose by HbA <sub>1c</sub> at baseline.....                                                                                                                                                                                                                                                                        | 15 |
| <b>eTable 6.</b> Fasting lipid profile.....                                                                                                                                                                                                                                                                                                                                       | 16 |
| <b>eTable 7.</b> Vital signs and additional safety parameters.....                                                                                                                                                                                                                                                                                                                | 17 |
| <b>eTable 8.</b> Prevalence of gastrointestinal TEAEs by maximum severity level.....                                                                                                                                                                                                                                                                                              | 19 |
| <b>eTable 9.</b> Hypoglycemia events through safety follow-up <sup>a</sup> .....                                                                                                                                                                                                                                                                                                  | 20 |
| <b>eTable 10.</b> Malignant neoplasms reported during the study.....                                                                                                                                                                                                                                                                                                              | 21 |
| <b>eFigure 1.</b> SURPASS-5 study design.....                                                                                                                                                                                                                                                                                                                                     | 22 |
| <b>eFigure 2.</b> Secondary efficacy outcomes from efficacy estimand. (A) HbA <sub>1c</sub> change from baseline at week 40, (B) proportion of patients achieving HbA <sub>1c</sub> levels <7.0%, ≤6.5%, and <5.7% at week 40, (C) proportion of patients achieving body weight loss ≥5%, ≥10% and ≥15% at week 40 (D) mean 7-point SMBG profiles at baseline and at week 40..... | 23 |
| <b>eFigure 3.</b> Efficacy measures (treatment-regimen estimand). (A) body weight change from baseline to week 40; and (B) proportion of patients achieving body weight loss targets ≥5%, ≥10%, and ≥15% at week 40.....                                                                                                                                                          | 24 |
| <b>eFigure 4.</b> Daily mean insulin glargine dose changes over time. (A) insulin glargine dose (IU/kg/day) percent change from baseline and (B) insulin glargine dose (IU/kg/day) change from baseline.....                                                                                                                                                                      | 25 |
| <b>eFigure 5.</b> Fasting lipid profile at week 40.....                                                                                                                                                                                                                                                                                                                           | 26 |
| <b>eFigure 6.</b> Vital parameters (A) pulse rate (bpm), (B) systolic blood pressure (mmHg), and (C) diastolic blood pressure (mmHg).....                                                                                                                                                                                                                                         | 27 |
| <b>eFigure 7.</b> BMI and waist circumference over time and change from baseline.....                                                                                                                                                                                                                                                                                             | 28 |
| <b>eFigure 8.</b> Incidence of diarrhea, nausea, and vomiting over time.....                                                                                                                                                                                                                                                                                                      | 29 |
| <b>eFigure 9.</b> Prevalence of (A) diarrhea, (B) nausea, and (C) vomiting over time.....                                                                                                                                                                                                                                                                                         | 30 |

## eAPPENDIX

### Patient Eligibility Criteria for SURPASS-5 Study

#### Inclusion Criteria

Patients were eligible to enter the SURPASS-5 study only if they met all the following inclusion criteria at screening.

1. Had been diagnosed with type 2 diabetes (T2D) based on the World Health Organization classification or other locally applicable diagnostic standards and had been treated with insulin glargine (U100), once daily with or without metformin  $\geq 3$  months prior to Visit 1
2. Had HbA<sub>1c</sub>  $\geq 7.0\%$  (53 mmol/mol) to  $\leq 10.5\%$  (91 mmol/mol), as determined by the central laboratory at Visit 1.
3. Had been on stable doses of once-daily insulin glargine ( $>0.25$  IU/kg/day or  $>20$  IU/day) and metformin (if taken) during the 3-month period prior to Visit 1. Insulin glargine dose was considered stable when all doses during this period were within the range defined by  $\pm 20\%$  of the most commonly used insulin dose during this same period. Doses of metformin were considered stable if all prescribed doses during this period were in the range between the minimum required dose ( $\geq 1500$  mg/day) and the maximum approved dose per the locally approved label
4. Required further insulin glargine dose increase at Visit 3 per the treat-to-target (TTT) algorithm based on the self-monitored blood glucose (SMBG) data collected during the prior week
5. Were of stable weight ( $\pm 5\%$ )  $\geq 3$  months prior to Visit 1 and agreed to not initiate a diet and/or exercise program during the study with the intent of reducing body weight other than the lifestyle and dietary measures for diabetes treatment
6. Had body mass index (BMI)  $\geq 23$  kg/m<sup>2</sup> at Visit 1
7. Were 18 years old or of an acceptable age to provide informed consent according to local regulations, whichever is older
  - (a) Male patients should have been willing to use reliable contraceptive methods throughout the study and for at least three months after last injection
  - (b) Female patients:
    - Female patients not of childbearing potential due to surgical sterilization (hysterectomy or bilateral oophorectomy or tubal ligation), congenital anomaly (i.e., Mullerian agenesis) or menopause
    - Women with an intact uterus are deemed postmenopausal if they were 45 years old, and
      - had not taken hormones or oral contraceptives within the last year and had cessation of menses for at least one year, OR
      - had at least six months and less than 12 months of spontaneous amenorrhea with follicle-stimulating hormone (FSH) and estradiol levels consistent with a postmenopausal state (FSH  $\geq 40$  mIU/mL and estradiol  $< 30$  pg/mL)
    - Female patients of childbearing potential (not surgically sterilized and between menarche and 1-year postmenopausal) must have been:
      - test negative for pregnancy at Visit 1 based on a serum pregnancy test AND
      - if sexually active, agreed to use two forms of effective contraception, where at least one form is highly effective for the duration of the trial and for 30 days thereafter
      - not be breastfeeding
8. In the investigator's opinion, were well-motivated, capable, and willing to:
  - perform fingerstick BG monitoring, including scheduled BG profiles with up to 7 measurements in one day
  - learn how to self-inject study drugs as required for this protocol (visually impaired persons who were not able to perform the injections must have had the assistance of a sighted individual trained to inject the study drug; persons with physical limitations who were not able to perform the injections must have had the assistance of an individual trained to inject the study drug)
  - were willing and able to inject study drugs
  - maintain a study diary, as required for this protocol
  - had a sufficient understanding of one of the provided languages of the country such that they will be able to complete the patient questionnaires
9. Had given written informed consent to participate in this study in accordance with local regulations and the ethical review board (ERB) governing the study site

## Exclusion criteria

Patients were excluded from study enrolment if they meet any of the following criteria at screening:

1. Had type 1 diabetes mellitus (T1D)
2. Had chronic or acute pancreatitis any time prior to study entry (Visit 1)
3. Had history of: proliferative diabetic retinopathy or diabetic maculopathy or nonproliferative diabetic retinopathy that requires acute treatment (a dilated fundoscopic examination performed by an ophthalmologist or optometrist between Visit 2 and Visit 3 is required to confirm eligibility)
4. Had a history of severe hypoglycemia and/or hypoglycemia unawareness within the 6 months prior to Visit 1
5. Had a history of diabetic ketoacidosis or hyperosmolar state/coma
6. Had a known clinically significant gastric emptying abnormality (for example, severe diabetic gastroparesis or gastric outlet obstruction), had undergone or plan to undergo during the course of the study: a gastric bypass (bariatric) surgery or restrictive bariatric surgery (for example, Lap-Band®), or chronically took drugs that directly affect gastrointestinal (GI) motility
7. Had any of the following cardiovascular (CV) conditions within two months prior to Visit 1: acute myocardial infarction, or cerebrovascular accident (stroke) or hospitalization due to congestive heart failure (CHF)
8. Had New York Heart Association Functional Classification III and IV CHF
9. Had acute or chronic hepatitis, signs and symptoms of any other liver disease other than non-alcoholic fatty liver disease (NAFLD), or alanine aminotransferase (ALT) level >3.0 times the upper limit of the reference range, as determined by the central laboratory at study entry; patients with NAFLD were eligible for participation in this trial only if their ALT level was ≤3.0 times the upper limit of normal (ULN) for the reference range
10. Had an estimated glomerular filtration rate <30 mL/min/1.73 m<sup>2</sup>, calculated by Chronic Kidney Disease-Epidemiology as determined by central laboratory at Visit 1; for patients on metformin, estimated glomerular filtration rate <45 mL/min/1.73 m<sup>2</sup> (or lower than the country-specific threshold for using the protocol-required dose of metformin per local label)
11. Had evidence of a significant, uncontrolled endocrine abnormality (for example, thyrotoxicosis or adrenal crises), in the opinion of the investigator
12. Had family or personal history of medullary thyroid carcinoma (MTC) or multiple endocrine neoplasia syndrome type 2
13. Had a serum calcitonin level of ≥35 ng/L, as determined by central laboratory at Visit 1
14. Had known or suspected hypersensitivity to trial product(s) or related products
15. Had evidence of a significant, active autoimmune abnormality (for example, lupus or rheumatoid arthritis) that, in the opinion of the investigator, was likely to require concurrent treatment with systemic glucocorticoids in the next 12 months
16. Had a transplanted organ (corneal transplants [keratoplasty] allowed) or awaiting an organ transplant
17. Had a history of an active or untreated malignancy or are in remission from a clinically significant malignancy (other than basal or squamous cell skin cancer, in situ carcinomas of the cervix, or in situ prostate cancer) for less than five years
18. Had a history of any other condition (such as known drug, alcohol abuse, or psychiatric disorder) that, in the opinion of the investigator, may preclude the patient from following and completing the protocol
19. Had any haematological condition that may interfere with HbA<sub>1c</sub> measurement (for example, haemolytic anaemias and sickle cell disease)
20. Treatment with any glucose-lowering agent(s) other than stated in the inclusion criteria [4] in a period of three months prior to Visit 1 and between Visit 1 and Visit 3
21. Had been treated with prescription drugs that promote weight loss (for example, Saxenda [liraglutide 3.0 mg], Xenical® [orlistat], Meridia® [sibutramine], Acutrim® [phenylpropanolamine], Sanorex® [mazindol], Apidex® [phentermine], BELVIQ® [lorcaserin], Qsymia™ [phentermine/topiramate combination], Contrave® [naltrexone/bupropion], or similar other body weight loss medications including over-the-counter (OTC) medications [for example, alli®]) within three months prior to Visit 1 and/or between study entry (Visit 1) and randomisation (Visit 3)
22. Were receiving chronic (>2 weeks or 14 days) systemic glucocorticoid therapy (excluding topical, intraocular, intranasal, or inhaled preparations) or had received such therapy within one month of Visit 1 or between Visits 1 and 3
23. Were enrolled in any other clinical study involving an investigational product or any other type of medical research judged not to be scientifically or medically compatible with this study
24. Had participated, within the last 30 days in a clinical study involving an investigational product. If the previous investigational product had a long half-life, 5 half-lives or 30 days (whichever is longer) should have passed

25. Had previously completed or withdrawn from this study or any other study investigating tirzepatide
26. Were investigator site personnel directly affiliated with this study and/or their immediate families.  
Immediate family was defined as a spouse, parent, child, or sibling, whether biological or legally adopted
27. Were Lilly employees
28. Were unwilling or unable to comply with the use of a paper diary to directly record data from the subject

### **Criteria for persistent hyperglycemia and initiation of rescue therapy**

Add-on glycemic rescue therapy was allowed for patients who met any one of the following prespecified criteria for severe, persistent hyperglycemia and no intercurrent cause of the hyperglycemia could be identified (investigators should first confirm that the patient is fully compliant with the assigned therapeutic regimen and that the patient did not have an acute condition causing severe hyperglycemia):

- average daily blood glucose (BG) from the once-weekly 4-point self-monitored blood glucose (SMBG) profile  $>270$  mg/dL ( $>15.0$  mmol/L) over at least a consecutive 2-week period at any time 16 to 24 weeks post randomization; OR
- average daily BG from the once-weekly 4-point SMBG profile  $>240$  mg/dL ( $>13.3$  mmol/L) over a consecutive 2-week period at any time 25 to 32 weeks post randomization; OR
- average daily BG from the once-weekly 4-point SMBG profile  $>200$  mg/dL ( $>11.1$  mmol/L) over a consecutive 2-week period at any time beyond the first 32 weeks post randomization; OR
- $\text{HbA}_{1c} \geq 8.5\%$  at 24 weeks, with inadequate response to the existing regimen defined as improvement in  $\text{HbA}_{1c}$  over the last 3 months (Week 12 to Week 24) that is,  $<0.3\%$

Rescue therapy option:

The criteria described above for severe, persistent hyperglycemia was only applicable after Week 16. The first choice before initiating any rescue therapy for those patients during the initial 16 weeks was to follow the treat-to-target (TTT) algorithm to increase the dose of insulin glargine. Rescue treatment with pramlintide, DPP-4 inhibitors, GLP-1 receptor agonists or any other basal insulin was not allowed.

### **Adjudicated events**

#### **Pancreatic adverse events**

Only cases of pancreatic hyperenzymemia that underwent additional diagnostic follow-up and/or were accompanied by symptoms suggestive of pancreatitis were submitted for adjudication. All suspected cases of acute or chronic pancreatitis were adjudicated by an independent clinical endpoint committee (CEC). In addition, AEs of severe or serious abdominal pain of unknown etiology were also submitted to CEC to assess for possible pancreatitis or other pancreatic disease. Relevant data from patients with acute or chronic pancreatitis and those with severe or serious abdominal pain were entered into a specifically designed eCRF page by study site or Lilly staff. The adjudication committee representative entered the results of adjudication in a corresponding eCRF page.

#### **Major adverse cardiovascular events**

Deaths and nonfatal cardiovascular AEs were adjudicated by a committee of physicians external to Lilly with cardiology expertise. The nonfatal cardiovascular AEs to be adjudicated included the following:

- Myocardial infarction
- Hospitalization for unstable angina
- Hospitalization for heart failure
- Coronary interventions (such as coronary artery bypass graft or percutaneous coronary intervention), and
- Cerebrovascular events including cerebrovascular accident (stroke) and transient ischemic attack.

### **Statistical analysis**

In this study, two estimands were prespecified in the protocol and both intended to estimate the treatment effect for all randomized patients. Both estimands are based on the newly released ICH E9 (R1) addendum on estimands and sensitivity analyses in clinical trials.

One estimand was the ‘treatment regimen estimand’, which evaluated the treatment effect of tirzepatide treatments relative to placebo irrespective of adherence to investigational product or introduction of rescue therapy (using a treatment policy strategy to handle intercurrent events per ICH E9 [R1]). For the estimation of this estimand, missing endpoint data were imputed using method of multiple imputation based on the placebo arm.

Another estimand was the ‘efficacy estimand’, which evaluated the treatment effect of tirzepatide treatments relative to placebo if all patients had adhered to treatment and didn’t receive rescue therapy. This estimand used a hypothetical strategy to handle intercurrent events (ICH E9[R1]) and was intended to provide an estimation of the achievable study treatment effect when patients took the treatment as planned and without confounding of other rescue medication use. The resulting missing values (discarded after the use of rescue medication and/or treatment discontinuation, or unobserved) were implicitly handled by the MMRM under the assumption of missing at random.

All patients who were randomized and took at least one dose of study medication (mITT population) were included in the analyses of assessing both estimands. Patients who discontinued study drug due to inadvertent enrollment were excluded from efficacy analyses. The detailed analysis with respect to the two estimands are provided below.

### **Treatment-regimen estimand**

The primary analysis relative to the treatment-regimen estimand was conducted utilizing HbA<sub>1c</sub> data in the full analysis set (FAS), which included data through the 40-week treatment period using analysis of covariance (ANCOVA) model with treatment, country, baseline metformin use (Yes/No) as fixed effects and baseline HbA<sub>1c</sub> as a covariate. Missing HbA<sub>1c</sub> value at week 40 was imputed 100 times using method of multiple imputation based on the placebo arm. Statistical inference over imputed data was guided by Rubin’s rule (Rubin DB. Multiple imputation for nonresponse in surveys. New York: John Wiley & Sons Inc.;1987)

A similar approach was used for analysis of change from baseline in body weight and FSG except that baseline HbA<sub>1c</sub> category ( $\leq 8.0\%$ ,  $>8.0\%$  [ $\leq 64$ ,  $>64$  mmol/mol]) was included as a fixed effect in place of baseline HbA<sub>1c</sub> as a covariate and baseline of corresponding variable was used as an additional covariate in the model.

For analysis of proportion of patients achieving HbA<sub>1c</sub>  $<7.0\%$ ,  $\leq 6.5\%$ , and  $<5.7\%$  at 40 weeks, logistic regression was used, which included the response variable of dichotomized HbA<sub>1c</sub> value at week 40, the fixed categorical effects of country, baseline metformin use (Yes/No), treatment, as well as the fixed continuous effect of baseline HbA<sub>1c</sub>. Before dichotomization, missing continuous value at week 40 was imputed using multiple imputation based on the placebo arm as described above. Statistical inference over imputed data was guided by Rubin’s rule.<sup>1</sup>

### **Efficacy estimand**

Primary endpoint analysis was conducted using a mixed model for repeated measures (MMRM) for HbA<sub>1c</sub> data from baseline through 40 weeks (efficacy analysis set [EAS]), with treatment, visit, treatment-by-visit interaction, country, baseline metformin use (Yes/No) as fixed effects, baseline HbA<sub>1c</sub> as a covariate, and patient as a random effect. A similar MMRM model was used for other continuous secondary endpoint analyses, with baseline HbA<sub>1c</sub> category ( $\leq 8.0\%$ ,  $>8.0\%$  [ $\leq 64$ ,  $>64$  mmol/mol]) as an additional fixed effect and corresponding baseline measure as a covariate.

For analysis of proportion of patients achieving HbA<sub>1c</sub>  $<7.0\%$ ,  $\leq 6.5\%$ , and  $<5.7\%$  at Week 40, logistic regression was used, which included treatment, country, metformin use (Yes/No) as fixed effects, and baseline HbA<sub>1c</sub> as a covariate. Missing values were imputed using the predicted value from primary endpoint MMRM analysis and then dichotomised.

### **Type 1 error rate control strategy for primary and key secondary efficacy analysis**

For analyses within each estimand, the type 1 error control strategy for evaluation of the primary and key secondary objectives were as follows:

1. H<sub>15,1</sub> and H<sub>15,2</sub> were evaluated hierarchically each at a 2-sided 0.025 significance level conditioned on successfully achieving the preceding objective. In parallel,
2. H<sub>10,1</sub> and H<sub>10,2</sub> were evaluated hierarchically each at a 2-sided 0.025 significance level conditioned on successfully achieving the preceding objective.
3. a. If all objectives in #1 and #2 above were successfully established, H<sub>5,1</sub> and H<sub>5,2</sub> are evaluated hierarchically, each at a 2-sided 0.05 significance level.  
b. If all objectives in only #1 or only #2 above were successfully established, H<sub>5,1</sub> and H<sub>5,2</sub> were evaluated hierarchically, each at a 2-sided 0.025 significance level.

4. If both objectives:  $H_{5,1}$  and  $H_{5,2}$  were successfully established and
  - a. If all objectives in #1 and #2 above are successfully established, then  $H_{10,3}$ ,  $H_{15,3}$ ,  $H_{10,4}$ ,  $H_{15,4}$ ,  $H_{5,3}$ ,  $H_{5,4}$ ,  $H_{15,5}$ , and  $H_{10,5}$  were evaluated hierarchically each at a 2-sided 0.05 significance level conditioned on successfully achieving the preceding objective.
  - b. If all objectives in only #1 or only #2 above were successfully established, then  $H_{10,3}$ ,  $H_{15,3}$ ,  $H_{10,4}$ ,  $H_{15,4}$ ,  $H_{5,3}$ ,  $H_{5,4}$ ,  $H_{15,5}$ , and  $H_{10,5}$  were evaluated hierarchically each at a 2-sided 0.025 significance level conditioned on successfully achieving the preceding objective.
5. If all objectives in #3 and #4 above were successfully established, and at least 1 objective from #1 or #2 above was not successfully established, we recycled 100% of the unused alpha back to #1 or #2 above.

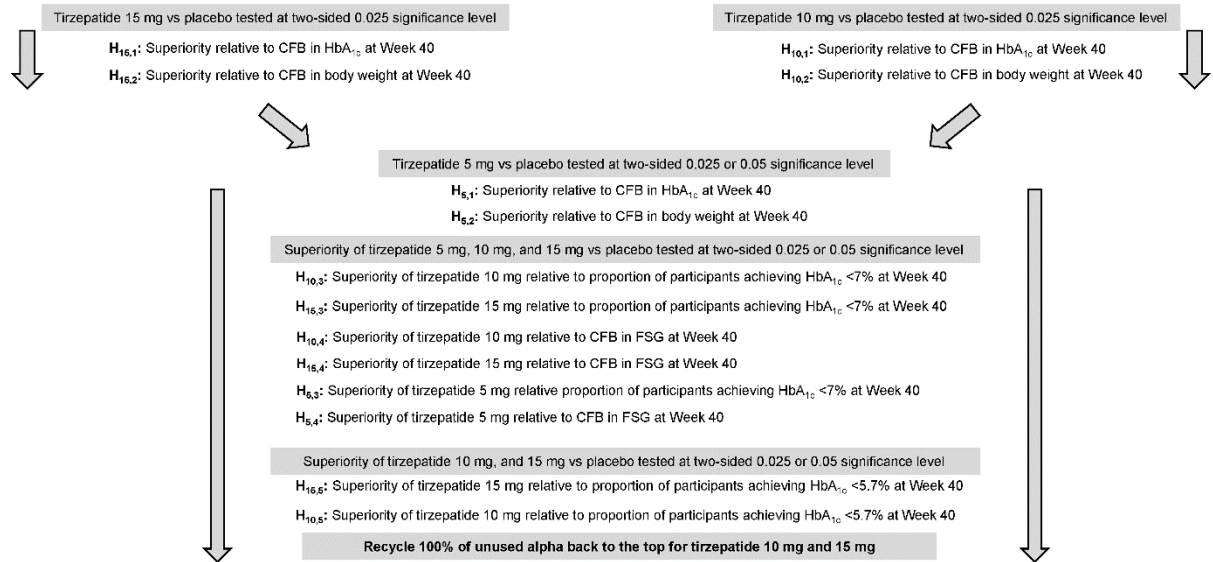

## Safety and other Measures

Safety was assessed on the safety analysis set, which consisted of all available data, including safety follow-up, from the modified intention-to-treat (mITT) population, irrespective of adherence to study treatment or initiation of antihyperglycemic rescue therapy. Summary statistics were provided for incidence of adverse events (AEs), study and treatment discontinuation due to AEs, and death. Fisher's exact test was used to compare the treatment groups. For continuous laboratory analytes, summary statistics were provided by visit, with statistical comparisons among treatment at each visit conducted using an MMRM analysis. Lipid profile, pancreatic and liver enzymes were analysed on log-transformed data and then converted back to original scale.

## Laboratory methods

Serum protein biomarker concentration levels were assessed using ELISA assays as described in Frias et al. 2018.<sup>2</sup>



## Supplementary tables and figures

**eTable 1. Insulin glargine treat-to-target algorithm**

| Median Fasting Blood Glucose<br>(Based on last 3 SMBG values) |            | Adjustment of Insulin<br>Glargine if Dose <20<br>IU | Adjustment of Insulin<br>Glargine if Dose ≥20<br>IU |
|---------------------------------------------------------------|------------|-----------------------------------------------------|-----------------------------------------------------|
| mg/dL                                                         | mmol/L     |                                                     |                                                     |
| ≤70                                                           | ≤3.9       | -1 or -2 IU <sup>a,b</sup>                          | -2 to 4 IU <sup>a,b</sup>                           |
| 71 to 100                                                     | 4.0 to 5.5 | No adjustment                                       | No adjustment                                       |
| 101 to 119                                                    | 5.6 to 6.6 | +1 IU                                               | +2 IU                                               |
| 120 to 139                                                    | 6.7 to 7.7 | +2 IU                                               | +4 IU                                               |
| 140 to 179                                                    | 7.8 to 9.9 | +3 IU                                               | +6 IU                                               |
| ≥180                                                          | ≥10.0      | +4 IU                                               | +8 IU                                               |

Algorithm adapted from Riddle, et al., 2003.<sup>3</sup> <sup>a</sup>The insulin dose was also decreased by 1 to 2 IU or 2 to 4 IU if (i) multiple episodes of nonsevere hypoglycemia were recorded during the assessment period at any time during the day; and/or (ii) at least 1 episode that met the criteria for severe hypoglycemia (events requiring assistance of a third person to administer therapy) or was associated with SMBG value <54 mg/dL (<3.0 mmol/L) was recorded during the assessment period; <sup>b</sup>If only one hypoglycemic episode with SMBG value ≥54 mg/dL (≥3.0 mmol/L) and ≤70 mg/dL (≤3.9 mmol/L) was recorded, insulin dose was not changed.

Abbreviations: SMBG, self-monitored blood glucose; IU, international units.

**eTable 2. Primary and secondary outcomes (efficacy estimand)**

| Efficacy endpoints <sup>a</sup>                                       | Tirzepatide 5 mg       | Tirzepatide 10 mg      | Tirzepatide 15 mg      | Placebo                |
|-----------------------------------------------------------------------|------------------------|------------------------|------------------------|------------------------|
|                                                                       | (n = 116)              | (n = 119)              | (n = 120)              | (n = 120)              |
| <b>Primary endpoint</b>                                               |                        |                        |                        |                        |
| <b>HbA<sub>1c</sub>, %</b>                                            |                        |                        |                        |                        |
| Baseline                                                              | 8.29                   | 8.34                   | 8.22                   | 8.39                   |
| Change from baseline at week 40 (95% CI)                              | -2.23 (-2.39, -2.07)   | -2.59 (-2.75, -2.43)   | -2.59 (-2.75, -2.42)   | -0.93 (-1.09, -0.78)   |
| Difference versus placebo (95% CI) <sup>b</sup>                       | -1.30 (-1.52, -1.07)   | -1.66 (-1.88, -1.43)   | -1.65 (-1.88, -1.43)   | -                      |
| <i>P</i> value                                                        | <.001                  | <.001                  | <.001                  | -                      |
| <b>HbA<sub>1c</sub>, mmol/mol</b>                                     |                        |                        |                        |                        |
| Baseline                                                              | 67.1                   | 67.7                   | 66.4                   | 68.2                   |
| Change from baseline at week 40 (95% CI)                              | -24.4 (-26.1, -22.6)   | -28.3 (-30.0, -26.5)   | -28.3 (-30.1, -26.5)   | -10.2 (-11.9, -8.5)    |
| Difference versus placebo (95% CI)                                    | -14.2 (-16.6, -11.7)   | -18.1 (-20.6, -15.7)   | -18.1 (-20.5, -15.6)   | -                      |
| <b>Secondary endpoints</b>                                            |                        |                        |                        |                        |
| <b>Patients achieving HbA<sub>1c</sub> targets at week 40</b>         |                        |                        |                        |                        |
| <7.0% (<53 mmol/mol), No. (%)                                         | 107 (93.0)             | 110 (97.4)             | 110 (94.0)             | 40 (33.9)              |
| Absolute difference versus placebo, %                                 | 59.1                   | 63.5                   | 60.1                   | -                      |
| Odds ratio versus placebo (95% CI) <sup>b</sup>                       | 37.8 (15.2, 93.7)      | 100.1 (30.0, 333.6)    | 43.3 (16.9, 110.8)     | -                      |
| <i>P</i> value                                                        | <.001                  | <.001                  | <.001                  | -                      |
| ≤6.5% (≤48 mmol/mol), No. (%)                                         | 92 (80.0)              | 107 (94.7)             | 108 (92.3)             | 20 (17.0)              |
| Absolute difference versus placebo, %                                 | 63.1                   | 77.7                   | 75.4                   | -                      |
| Odds ratio versus placebo (95% CI) <sup>c</sup>                       | 20.5 (10.3, 41.0)      | 87.8 (34.1, 225.9)     | 61.4 (26.1, 144.2)     | -                      |
| <i>P</i> value                                                        | <.001                  | <.001                  | <.001                  | -                      |
| <5.7% (<39 mmol/mol), No. (%)                                         | 30 (26.1)              | 54 (47.8)              | 73 (62.4)              | 3 (2.5)                |
| Absolute difference versus placebo, %                                 | 23.6                   | 45.3                   | 59.9                   | -                      |
| Odds ratio versus placebo (95% CI) <sup>d</sup>                       | 12.2 (3.9, 38.0)       | 32.4 (10.5, 99.5)      | 56.3 (18.3, 173.3)     | -                      |
| <i>P</i> value                                                        | <.001                  | <.001                  | <.001                  | -                      |
| <b>Fasting serum glucose, mg/dL</b>                                   |                        |                        |                        |                        |
| Baseline                                                              | 162.2                  | 162.9                  | 160.4                  | 164.4                  |
| Change from baseline at week 40 (95% CI)                              | -61.4 (-66.39, -56.36) | -67.9 (-72.93, -62.89) | -67.7 (-72.88, -62.51) | -38.9 (-43.82, -34.01) |
| Difference versus placebo (95% CI) <sup>b</sup>                       | -22.5 (-29.5, -15.4)   | -29.0 (-36.0, -22.0)   | -28.8 (-35.9, -21.6)   | -                      |
| <i>P</i> value                                                        | <.001                  | <.001                  | <.001                  | -                      |
| <b>7-point self-monitored blood glucose values<sup>e</sup>, mg/dL</b> |                        |                        |                        |                        |
| Daily mean at baseline                                                | 186.6                  | 188.7                  | 183.0                  | 182.0                  |
| Daily mean change from baseline at week 40 (95% CI) <sup>c</sup>      | -67.1 (-71.1, -63.1)   | -71.7 (-75.7, -67.7)   | -73.7 (-77.9, -69.6)   | -39.4 (-43.5, -35.3)   |

|                                                                                                                                                                                                                                             |                      |                       |                        |                      |
|---------------------------------------------------------------------------------------------------------------------------------------------------------------------------------------------------------------------------------------------|----------------------|-----------------------|------------------------|----------------------|
| Difference versus placebo (95% CI)                                                                                                                                                                                                          | -27.7 (-33.5, -22.0) | -32.3 (-38.1, -26.6)  | -34.3 (-40.1, -28.5)   | -                    |
| <i>P</i> value                                                                                                                                                                                                                              | <.001                | <.001                 | <.001                  | -                    |
| Pre-meal daily mean at baseline                                                                                                                                                                                                             | 162.2                | 167.0                 | 161.0                  | 158.4                |
| Pre-meal daily mean change from baseline at week 40 (95% CI) <sup>c</sup>                                                                                                                                                                   | -55.8 (-59.4, -52.3) | -58.9 (-62.5, -55.4)  | -58.1 (-61.7, -54.4)   | -36.8 (-40.4, -33.3) |
| Difference versus placebo (95% CI)                                                                                                                                                                                                          | -19.0 (-24.0, -14.0) | -22.1 (-27.2, -17.1)  | -21.2 (-26.3, -16.1)   | -                    |
| <i>P</i> value                                                                                                                                                                                                                              | <.001                | <.001                 | <.001                  | -                    |
| 2-h post-meal daily mean at baseline                                                                                                                                                                                                        | 209.2                | 207.4                 | 203.3                  | 204.9                |
| 2-h post-meal daily mean change from baseline at week 40 (95% CI) <sup>c</sup>                                                                                                                                                              | -76.7 (-81.9, -71.4) | -82.3 (-87.5, -77.1)  | -87.4 (-92.7, -82.1)   | -40.5 (-45.7, -35.3) |
| Difference versus placebo (95% CI)                                                                                                                                                                                                          | -36.2 (-43.6, -28.7) | -41.8 (-49.2, -34.4)  | -46.9 (-54.4, -39.5)   | -                    |
| <i>P</i> value                                                                                                                                                                                                                              | <.001                | <.001                 | <.001                  | -                    |
| <b>Body weight, kg</b>                                                                                                                                                                                                                      |                      |                       |                        |                      |
| Baseline                                                                                                                                                                                                                                    | 95.5                 | 95.4                  | 96.2                   | 94.1                 |
| Change from baseline at week 40 (95% CI) <sup>b</sup>                                                                                                                                                                                       | -6.2 (-7.29, -5.01)  | -8.2 (-9.37, -7.08)   | -10.9 (-12.11, -9.78)  | 1.7 (0.58, 2.81)     |
| Difference versus placebo (95% CI)                                                                                                                                                                                                          | -7.8 (-9.4, -6.3)    | -9.9 (-11.5, -8.3)    | -12.6 (-14.2, -11.0)   | -                    |
| <i>P</i> value                                                                                                                                                                                                                              | <.001                | <.001                 | <.001                  | -                    |
| <b>Patients achieving body weight loss targets at Week 40</b>                                                                                                                                                                               |                      |                       |                        |                      |
| ≥5% loss, No. (%)                                                                                                                                                                                                                           | 62 (53.9)            | 73 (64.6)             | 99 (84.6)              | 7 (5.9)              |
| Absolute difference versus placebo, %                                                                                                                                                                                                       | 48.0                 | 58.7                  | 78.7                   | -                    |
| Odds ratio versus placebo (95% CI) <sup>c</sup>                                                                                                                                                                                             | 17.15 (7.55, 38.93)  | 27.24 (11.87, 62.55)  | 79.61 (32.76, 193.44)  | -                    |
| <i>P</i> value                                                                                                                                                                                                                              | <.001                | <.001                 | <.001                  | -                    |
| ≥10% loss, No. (%)                                                                                                                                                                                                                          | 26 (22.6)            | 53 (46.9)             | 60 (51.3)              | 1 (0.9)              |
| Absolute difference versus placebo, %                                                                                                                                                                                                       | 21.8                 | 46.1                  | 50.4                   | -                    |
| Odds ratio versus placebo (95% CI) <sup>c</sup>                                                                                                                                                                                             | 24.03 (4.65, 124.33) | 81.55 (15.93, 417.38) | 101.81 (19.88, 521.44) | -                    |
| <i>P</i> value                                                                                                                                                                                                                              | <.001                | <.001                 | <.001                  | -                    |
| ≥15% loss, No. (%)                                                                                                                                                                                                                          | 8 (7.0)              | 30 (26.6)             | 37 (31.6)              | 0 (0.0)              |
| Absolute difference versus placebo, %                                                                                                                                                                                                       | 7.0                  | 26.6                  | 31.6                   | -                    |
| Odds ratio versus placebo (95% CI) <sup>c</sup>                                                                                                                                                                                             | 19.38 (1.21, 310.99) | 93.94 (6.17, 1430.49) | 125.41 (8.25, 1905.85) | -                    |
| <i>P</i> value                                                                                                                                                                                                                              | <.036                | .001                  | <.001                  | -                    |
| <b>Patients achieving composite endpoint: HbA<sub>1c</sub> &lt;7.0% without body weight gain and without clinically significant documented symptomatic hypoglycemia (blood glucose &lt;54 mg/dL) or severe hypoglycemia (%)<sup>f</sup></b> |                      |                       |                        |                      |
| Week 40 <sup>c</sup>                                                                                                                                                                                                                        | 77.7                 | 75.5                  | 80.3                   | 11.9                 |
| Odds ratio versus placebo (95% CI)                                                                                                                                                                                                          | 25.88 (12.48, 53.65) | 22.92 (11.13, 47.20)  | 30.22 (14.36, 63.58)   | -                    |
| <i>P</i> value                                                                                                                                                                                                                              | <.001                | <.001                 | <.001                  | -                    |
| <b>Patients achieving composite endpoint: HbA<sub>1c</sub> ≤6.5% without body weight gain and without clinically significant documented symptomatic hypoglycemia (blood glucose &lt;54 mg/dL) or severe hypoglycemia (%)<sup>f</sup></b>    |                      |                       |                        |                      |

|                                    |                      |                      |                      |     |
|------------------------------------|----------------------|----------------------|----------------------|-----|
| Week 40 <sup>c</sup>               | 66.7                 | 72.8                 | 77.9                 | 8.4 |
| Odds ratio versus placebo (95% CI) | 21.92 (10.26, 46.83) | 29.28 (13.51, 63.47) | 38.52 (17.49, 84.83) | -   |
| <i>P</i> value                     | <.001                | <.001                | <.001                | -   |

<sup>a</sup>Data presented are estimated mean unless specified otherwise.

<sup>b</sup>Tested for superiority, controlled for type 1 error.

<sup>c</sup>Tested for superiority, not controlled for type 1 error.

<sup>d</sup>Tested for superiority, controlled for type 1 error only for tirzepatide 10 mg and 15 mg versus placebo.

<sup>e</sup>7-point SMBG included fasting premeal, morning 2-hours postmeal, midday premeal, midday 2-hours post meal, evening premeal, evening 2-hours post meal, and bedtime readings. Analysis of covariance model used with treatment, country, baseline metformin use, baseline HbA<sub>1c</sub> category ( $\leq 8.0\%$ ,  $> 8.0\%$ ) as fixed effects and baseline endpoint value as a covariate.

<sup>f</sup>Results from logistic regression where missing HbA<sub>1c</sub> and weight at week 40 were imputed and dichotomized after predictions from mixed-model repeated measures model with treatment, visit, treatment-by-visit interaction, country, baseline metformin use, baseline HbA<sub>1c</sub> category ( $\leq 8.0\%$ ,  $> 8.0\%$ ) [for weight analysis] as fixed effects and baseline endpoint value as a covariate.

Data presented are for the efficacy estimand that evaluated treatment effects using on treatment data without use of rescue therapy.

Abbreviations: CI, confidence interval; HbA<sub>1c</sub>, glycated hemoglobin A<sub>1c</sub>; IU, international units; n, number of patients in the specified group; No., number.

**eTable 3. Number of patients assessed at each time point for HbA<sub>1c</sub>, fasting serum glucose and body weight over time (efficacy estimand)**

|                              | Number of patients at specified time points |     |     |     |     |     |     |     |     |     |     |     |     |     |     |     |
|------------------------------|---------------------------------------------|-----|-----|-----|-----|-----|-----|-----|-----|-----|-----|-----|-----|-----|-----|-----|
| Week →                       | 0                                           | 1   | 2   | 3   | 4   | 5   | 6   | 8   | 10  | 12  | 14  | 16  | 20  | 24  | 32  | 40  |
| <b>HbA<sub>1c</sub></b>      |                                             |     |     |     |     |     |     |     |     |     |     |     |     |     |     |     |
| Tirzepatide 5 mg             | 115                                         | -   | -   | -   | 110 | -   | -   | 104 | -   | 108 | -   | 105 | 106 | 107 | -   | 105 |
| Tirzepatide 10 mg            | 113                                         | -   | -   | -   | 110 | -   | -   | 109 | -   | 105 | -   | 105 | 101 | 106 | -   | 105 |
| Tirzepatide 15 mg            | 117                                         | -   | -   | -   | 115 | -   | -   | 103 | -   | 104 | -   | 102 | 99  | 101 | -   | 97  |
| Placebo                      | 118                                         | -   | -   | -   | 116 | -   | -   | 111 | -   | 113 | -   | 112 | 112 | 114 | -   | 111 |
| Total                        | 463                                         |     |     |     |     |     |     |     |     |     |     |     |     |     |     |     |
| <b>Fasting serum glucose</b> |                                             |     |     |     |     |     |     |     |     |     |     |     |     |     |     |     |
| Tirzepatide 5 mg             | 115                                         | -   | 112 | -   | 111 | -   | -   | 104 | -   | 107 | -   | 105 | 106 | 107 | -   | 105 |
| Tirzepatide 10 mg            | 116                                         | -   | 114 | -   | 109 | -   | -   | 109 | -   | 104 | -   | 105 | 101 | 105 | -   | 105 |
| Tirzepatide 15 mg            | 118                                         | -   | 115 | -   | 115 | -   | -   | 104 | -   | 104 | -   | 102 | 99  | 100 | -   | 97  |
| Placebo                      | 118                                         | -   | 116 | -   | 115 | -   | -   | 109 | -   | 112 | -   | 111 | 111 | 113 | -   | 109 |
| Total                        | 467                                         |     |     |     |     |     |     |     |     |     |     |     |     |     |     |     |
| <b>Body weight</b>           |                                             |     |     |     |     |     |     |     |     |     |     |     |     |     |     |     |
| Tirzepatide 5 mg             | 115                                         | -   | -   | -   | 111 | -   | -   | 106 |     | 107 | -   | 107 | 107 | 106 | 105 | 105 |
| Tirzepatide 10 mg            | 113                                         | -   | -   | -   | 110 | -   | -   | 109 |     | 105 | -   | 105 | 102 | 107 | 106 | 105 |
| Tirzepatide 15 mg            | 117                                         | -   | -   | -   | 116 | -   | -   | 105 |     | 104 | -   | 102 | 99  | 100 | 96  | 97  |
| Placebo                      | 118                                         | -   | -   | -   | 116 | -   | -   | 109 |     | 110 | -   | 112 | 111 | 114 | 112 | 110 |
| Total                        | 463                                         |     |     |     |     |     |     |     |     |     |     |     |     |     |     |     |
| <b>Insulin glargine dose</b> |                                             |     |     |     |     |     |     |     |     |     |     |     |     |     |     |     |
| Tirzepatide 5 mg             | 115                                         | 115 | 115 | 115 | 115 | 115 | 112 | 111 | 112 | 112 | 112 | 109 | 109 | 107 | 105 | 105 |
| Tirzepatide 10 mg            | 117                                         | 117 | 117 | 116 | 113 | 114 | 113 | 113 | 113 | 111 | 109 | 110 | 108 | 107 | 106 | 103 |
| Tirzepatide 15 mg            | 118                                         | 118 | 118 | 118 | 118 | 118 | 115 | 113 | 111 | 107 | 106 | 104 | 102 | 100 | 97  | 96  |
| Placebo                      | 119                                         | 119 | 119 | 117 | 118 | 117 | 117 | 117 | 117 | 117 | 117 | 117 | 117 | 114 | 112 | 111 |
| Total                        | 469                                         |     |     |     |     |     |     |     |     |     |     |     |     |     |     |     |

**eTable 4. Subgroup analysis of HbA<sub>1c</sub> at baseline HbA<sub>1c</sub> ≤8.0% or >8.0%**

|                                              | Tirzepatide 5 mg                          |                                           | Tirzepatide 10 mg                         |                                           | Tirzepatide 15 mg                         |                                           | Placebo                                   |                                           |
|----------------------------------------------|-------------------------------------------|-------------------------------------------|-------------------------------------------|-------------------------------------------|-------------------------------------------|-------------------------------------------|-------------------------------------------|-------------------------------------------|
|                                              | Baseline HbA <sub>1c</sub> ≤8.0% (n = 52) | Baseline HbA <sub>1c</sub> >8.0% (n = 63) | Baseline HbA <sub>1c</sub> ≤8.0% (n = 48) | Baseline HbA <sub>1c</sub> >8.0% (n = 65) | Baseline HbA <sub>1c</sub> ≤8.0% (n = 51) | Baseline HbA <sub>1c</sub> >8.0% (n = 66) | Baseline HbA <sub>1c</sub> ≤8.0% (n = 46) | Baseline HbA <sub>1c</sub> >8.0% (n = 72) |
| HbA <sub>1c</sub> , LS mean (SE), %          |                                           |                                           |                                           |                                           |                                           |                                           |                                           |                                           |
| Baseline                                     | 7.55 (0.05)                               | 8.90 (0.08)                               | 7.59 (0.05)                               | 8.90 (0.08)                               | 7.44 (0.05)                               | 8.82 (0.08)                               | 7.57 (0.05)                               | 8.91 (0.07)                               |
| At week 40                                   | 6.03 (0.10)                               | 6.08 (0.11)                               | 5.57 (0.10)                               | 5.84 (0.11)                               | 5.69 (0.10)                               | 5.76 (0.11)                               | 6.93 (0.10)                               | 7.73 (0.10)                               |
| Change from baseline to week 40 <sup>a</sup> | -1.52 (0.10)**                            | -2.81 (0.11)**                            | -1.98 (0.10)**                            | -3.05 (0.11)**                            | -1.85 (0.10)**                            | -3.13 (0.11)**                            | -0.61 (0.10)**                            | -1.16 (0.10)**                            |
| Difference vs placebo at week 40 (95% CI)    | -0.90 (-1.18, -0.62)                      | -1.66 (-1.94, -1.37)                      | -1.36 (-1.65, -1.08)                      | -1.89 (-2.17, -1.61)                      | -1.24 (-1.53, -0.95)                      | -1.97 (-2.25, -1.68)                      | -                                         | -                                         |
| <i>P</i> value                               | <.001                                     | <.001                                     | <.001                                     | <.001                                     | <.001                                     | <.001                                     | -                                         | -                                         |

Data presented are for the efficacy estimand that evaluated treatment effects using on treatment data without use of rescue therapy. Mixed-model repeated measures model used with treatment, visit, treatment-by-visit interaction, country, baseline metformin use, baseline HbA<sub>1c</sub> category (≤8.0%, >8.0%), baseline HbA<sub>1c</sub> category (≤8.0%, >8.0%)-by-visit interaction, baseline HbA<sub>1c</sub> category (≤8.0%, >8.0%)-by-treatment interaction, and baseline HbA<sub>1c</sub> category (≤8.0%, >8.0%)-by-Treatment-by-Time interaction as fixed effects and baseline HbA<sub>1c</sub> value as a covariate. \**P* <.05 and \*\**P* <.001 versus baseline.

Abbreviations: CFB, change from baseline; CI, confidence interval; HbA<sub>1c</sub>, glycated hemoglobin A<sub>1c</sub>; mITT, modified intent-to-treat (all randomly assigned patients who took at least 1 dose of study drug); SE, standard error.

**eTable 5. Subset analysis of daily mean insulin glargine dose by HbA<sub>1c</sub> at baseline**

|                                                              | <b>Tirzepatide 5 mg<br/>n = 116</b> | <b>Tirzepatide 10 mg<br/>n = 119</b> | <b>Tirzepatide 15 mg<br/>n = 120</b> | <b>Placebo<br/>n = 120</b> |
|--------------------------------------------------------------|-------------------------------------|--------------------------------------|--------------------------------------|----------------------------|
| <b>Patients with baseline HbA<sub>1c</sub> ≤8.0%, No.</b>    | 52                                  | 48                                   | 51                                   | 47                         |
| Insulin glargine dose, estimate (SE), IU/day                 |                                     |                                      |                                      |                            |
| At baseline                                                  | 33.1 (2.02)                         | 30.4 (1.93)                          | 34.1 (2.10)                          | 30.8 (1.98)                |
| Week 40                                                      | 35.8 (2.34)                         | 30.0 (2.03)                          | 29.5 (2.03)                          | 54.3 (3.78)                |
| Change from baseline to week 40                              | 4.2 (2.38)                          | -1.7 (2.06)                          | -2.2 (2.06)                          | 22.9 (3.83)                |
| Percent change from baseline to week 40                      | 13.0 (7.39)                         | -5.3 (6.41)                          | -6.7 (6.41)                          | 71.4 (11.94)**             |
| Estimate difference vs placebo (95% CI); <i>P</i> value      | -34.1 (-45.4, -20.4); <.001         | -44.7 (-54.4, -33.1); <.001          | -45.6 (-55.1, -34.0); <.001          | -                          |
| <b>Patients with baseline HbA<sub>1c</sub> &gt;8.0%, No.</b> | 63                                  | 69                                   | 67                                   | 72                         |
| Insulin glargine dose, estimate (SE), IU/day                 |                                     |                                      |                                      |                            |
| At baseline                                                  | 35.3 (2.05)                         | 33.1 (1.84)                          | 35.7 (2.01)                          | 34.4 (1.87)                |
| Week 40                                                      | 38.8 (4.39)                         | 40.5 (4.45)                          | 29.4 (3.27)                          | 63.0 (6.54)                |
| Change from baseline to week 40                              | 3.9 (2.66)                          | 6.3 (2.76)                           | -4.5 (2.05)                          | 27.6 (3.94)                |
| Percent change from baseline to week 40                      | 11.3 (7.69)                         | 18.2 (7.98)*                         | -13.1 (5.94)*                        | 79.7 (11.40)**             |
| Estimate difference vs placebo (95% CI); <i>P</i> value      | -38.0 (-48.5, -25.5); <.001         | -34.2 (-45.2, -21.1); <.001          | -51.6 (-59.7, -41.9); <.001          | -                          |

Data presented are for the efficacy estimand that evaluated treatment effects using on treatment data without use of rescue therapy. Insulin doses are log transformed before analysis to account for their skewed distribution and estimated ratio to baseline are transformed back for interpretation expressed as percent change from baseline to week 40 and estimated percent difference vs placebo. Mixed-model repeated measures model used with treatment, visit, treatment-by-visit interaction, country, baseline metformin use, as fixed effects and baseline endpoint value as a covariate within each subset of HbA<sub>1c</sub> category (≤8.0%, >8.0%)\**P*<.05, \*\**P*<.001 vs baseline.

Abbreviations: CI, confidence interval; HbA<sub>1c</sub>, glycated hemoglobin A<sub>1c</sub>; No., number, SE, standard error.

**eTable 6. Fasting lipid profile**

| Parameters (Efficacy Estimand)   |                                                         | Tirzepatide 5 mg<br>n = 116   |                 |                   | Tirzepatide 10 mg<br>n = 119  |                 |                   | Tirzepatide 15 mg<br>n = 120   |                 |                   | Placebo<br>n = 120 |                |                 |
|----------------------------------|---------------------------------------------------------|-------------------------------|-----------------|-------------------|-------------------------------|-----------------|-------------------|--------------------------------|-----------------|-------------------|--------------------|----------------|-----------------|
|                                  |                                                         | Baseline                      | CFB             | % CFB             | Baseline                      | CFB             | % CFB             | Baseline                       | CFB             | % CFB             | Baseline           | CFB            | % CFB           |
| <b>Total cholesterol (mg/dL)</b> | Estimate (SE)                                           | 167.1<br>(3.72)               | -14.6<br>(2.36) | -8.8<br>(1.42)**  | 166.3<br>(3.70)               | -17.1<br>(2.32) | -10.3<br>(1.39)** | 163.4<br>(3.78)                | -21.5<br>(2.34) | -12.9<br>(1.41)** | 167.7<br>(3.66)    | -0.6<br>(2.53) | -0.4<br>(1.52)  |
|                                  | Difference vs placebo for %CFB (95% CI); <i>P</i> value | -8.43 (-12.28, -4.42); <.001  |                 |                   | -9.93 (-13.71, -5.98); <.001  |                 |                   | -12.61 (-16.36, -8.70); <.001  |                 |                   | -                  |                |                 |
| <b>Triglycerides (mg/dL)</b>     | Estimate (SE)                                           | 153.5<br>(7.69)               | -22.0<br>(4.17) | -15.2<br>(2.89)** | 144.0<br>(7.21)               | -27.9<br>(3.96) | -19.3<br>(2.74)** | 138.3<br>(7.20)                | -35.9<br>(3.84) | -24.9<br>(2.66)** | 141.4<br>(6.95)    | -9.8<br>(4.50) | -6.8<br>(3.12)* |
|                                  | Difference vs placebo for %CFB (95% CI); <i>P</i> value | -9.07 (-17.23, -0.12); 0.047  |                 |                   | -13.48 (-21.23, -4.97); 0.003 |                 |                   | -19.43 (-26.80, -11.33); <.001 |                 |                   | -                  |                |                 |
| <b>LDL cholesterol (mg/dL)</b>   | Estimate (SE)                                           | 83.6<br>(3.31)                | -7.6<br>(2.04)  | -8.9<br>(2.39)**  | 85.7<br>(3.39)                | -10.9<br>(1.95) | -12.8<br>(2.29)** | 83.9<br>(3.47)                 | -13.2<br>(1.98) | -15.5<br>(2.32)** | 87.5<br>(3.40)     | 2.4<br>(2.26)  | 2.8<br>(2.65)   |
|                                  | Difference vs placebo for %CFB (95% CI); <i>P</i> value | -11.44 (-17.63, -4.79); .001  |                 |                   | -15.23 (-21.15, -8.87); <.001 |                 |                   | -17.83 (-23.70, -11.50); <.001 |                 |                   | -                  |                |                 |
| <b>VLDL (mg/dL)</b>              | Estimate (SE)                                           | 30.5<br>(1.45)                | -4.3<br>(0.81)  | -15.1<br>(2.86)** | 28.6<br>(1.37)                | -5.3<br>(0.78)  | -18.7<br>(2.73)** | 27.2<br>(1.36)                 | -6.9<br>(0.76)  | -24.1<br>(2.67)** | 27.7<br>(1.29)     | -1.6<br>(0.89) | -5.5<br>(3.11)  |
|                                  | Difference vs placebo for %CFB (95% CI); <i>P</i> value | -10.15 (-18.11, -1.42); 0.024 |                 |                   | -13.96 (-21.56, -5.62); 0.002 |                 |                   | -19.70 (-26.96, -11.72); <.001 |                 |                   | -                  |                |                 |
| <b>HDL cholesterol (mg/dL)</b>   | Estimate (SE)                                           | 44.1<br>(1.08)                | 0.9<br>(0.68)   | 2.1<br>(1.51)     | 45.2<br>(1.11)                | 0.8<br>(0.67)   | 1.8<br>(1.50)     | 45.5<br>(1.16)                 | 0.4<br>(0.70)   | 0.9<br>(1.55)     | 44.8<br>(1.07)     | 0.8<br>(0.66)  | 1.7<br>(1.47)   |
|                                  | Difference vs placebo for %CFB (95% CI); <i>P</i> value | 0.37 (-3.63, 4.54); 0.858     |                 |                   | 0.09 (-3.90, 4.24); 0.965     |                 |                   | -0.80 (-4.83, 3.41); 0.705     |                 |                   | -                  |                |                 |

Data presented are estimated means (SE) from analysis of covariance using data for the efficacy estimand that evaluated on treatment effects without use of rescue therapy. Lipid data were log transformed before analysis to account for their skewed distribution \**P* < .05, \*\**P* < .001 vs baseline.

Abbreviations: CFB, change from baseline; HDL, high-density lipoprotein; LDL, low-density lipoprotein; n, number of patients in the specified treatment group; SE, standard error; VLDL, very low-density lipoprotein.





| Parameter                                                                                                  | Tirzepatide 5 mg<br>n = 116 | Tirzepatide 10 mg<br>n = 119 | Tirzepatide 15 mg<br>n = 120 | Placebo<br>n = 120 |
|------------------------------------------------------------------------------------------------------------|-----------------------------|------------------------------|------------------------------|--------------------|
| <b>Liver Enzymes, estimate (SE), IU/L</b>                                                                  |                             |                              |                              |                    |
| <b>Alanine aminotransferase</b>                                                                            |                             |                              |                              |                    |
| Baseline                                                                                                   | 25.0 (1.15)                 | 24.9 (1.13)                  | 25.4 (1.16)                  | 23.4 (1.06)        |
| At week 40                                                                                                 | 19.9 (0.80)                 | 18.9 (0.75)                  | 17.7 (0.71)                  | 22.8 (0.90)        |
| Percent change from baseline to week 40                                                                    | -19.4 (3.25)*               | -23.3 (3.03)*                | -28.3 (2.89)**               | -7.5 (3.64)        |
| Difference vs placebo (%) (95% CI)                                                                         | -12.9 (-22.0, -2.7)         | -17.1 (-25.7, -7.5)          | -22.5 (-30.6, -13.4)         | -                  |
| P value vs placebo                                                                                         | .015                        | <.001                        | <.001                        | -                  |
| <b>Aspartate aminotransferase</b>                                                                          |                             |                              |                              |                    |
| Baseline                                                                                                   | 20.7 (0.77)                 | 20.4 (0.75)                  | 20.6 (0.76)                  | 19.0 (0.70)        |
| At week 40                                                                                                 | 19.3 (0.54)                 | 18.4 (0.51)                  | 17.3 (0.49)                  | 20.2 (0.55)        |
| Percent change from baseline to week 40                                                                    | -4.12 (2.70)                | -8.56 (2.52)*                | -14.07 (2.41)**              | 0.02 (2.75)        |
| Difference vs placebo (%) (95% CI)                                                                         | -4.1 (-11.3, 3.6)           | -8.6 (-15.3, -1.3)           | -14.1 (-20.5, -7.2)          | -                  |
| P value vs placebo                                                                                         | .283                        | .022                         | <.001                        | -                  |
| <b>Estimated glomerular filtration rate (CKD-EPI calculation), LS mean (SE), ml/min/1.73 m<sup>2</sup></b> |                             |                              |                              |                    |
| Baseline                                                                                                   | 86.0 (1.65)                 | 86.8 (1.63)                  | 83.9 (1.64)                  | 84.6 (1.62)        |
| Change from baseline to Week 40                                                                            | -6.0 (0.89)**               | -4.4 (0.88)**                | -3.6 (0.89)**                | -4.0 (0.87)**      |
| Difference vs placebo (95% CI)                                                                             | -2.0 (-4.5, 0.4);           | -0.4 (-2.9, 2.0)             | 0.4 (-2.0, 2.8)              | -                  |
| P value vs placebo                                                                                         | .106                        | .731                         | .746                         | -                  |

Data presented as estimated mean (SE) unless specified otherwise and used the safety analysis set for analyses. Mixed-model for repeated measures was used with treatment, visit, treatment-by-visit interaction, country, baseline metformin use, baseline HbA<sub>1c</sub> category ( $\leq 8.0\%$ ,  $>8.0\%$ ) as fixed effects and baseline endpoint value as a covariate. Data for liver and pancreatic enzymes were log transformed before analysis to account for their skewed distribution.

\* $P < .05$ , \*\* $P < .001$  vs baseline.

Abbreviations: BL, baseline; LS, least squares; n, number of patients in specified treatment group; SE, standard error.

**eTable 8. Prevalence of gastrointestinal TEAEs by maximum severity level**

|                                          | <b>Tirzepatide 5 mg<br/>n = 116</b> | <b>Tirzepatide 10 mg<br/>n = 119</b> | <b>Tirzepatide 15 mg<br/>n = 120</b> | <b>Placebo<br/>n = 120</b> |
|------------------------------------------|-------------------------------------|--------------------------------------|--------------------------------------|----------------------------|
| <b>Nausea/Vomiting/Diarrhea, No. (%)</b> |                                     |                                      |                                      |                            |
| Mild                                     | 10 (8.6)                            | 25 (21.0)                            | 29 (24.2)                            | 10 (8.3)                   |
| Moderate                                 | 11 (9.5)                            | 5 (4.2)                              | 10 (8.3)                             | 2 (1.7)                    |
| Severe                                   | 1 (0.9)                             | 1 (0.8)                              | 2 (1.7)                              | 1 (0.8)                    |
| <b>Diarrhea, No. (%)</b>                 |                                     |                                      |                                      |                            |
| Mild                                     | 8 (6.9)                             | 11 (9.24)                            | 18 (15.0)                            | 9 (7.5)                    |
| Moderate                                 | 5 (4.3)                             | 3 (2.5)                              | 6 (5.0)                              | 2 (1.7)                    |
| Severe                                   | 1 (0.9)                             | 1 (0.8)                              | 1 (0.8)                              | 1 (0.8)                    |
| <b>Nausea, No. (%)</b>                   |                                     |                                      |                                      |                            |
| Mild                                     | 6 (5.2)                             | 17 (14.3)                            | 13 (10.8)                            | 2 (1.7)                    |
| Moderate                                 | 9 (7.8)                             | 4 (3.4)                              | 8 (6.7)                              | 1 (0.8)                    |
| Severe                                   | 0 (0.0)                             | 0 (0.0)                              | 1 (0.8)                              | 0 (0.0)                    |
| <b>Vomiting, No. (%)</b>                 |                                     |                                      |                                      |                            |
| Mild                                     | 3 (2.6)                             | 7 (5.9)                              | 10 (8.3)                             | 2 (1.7)                    |
| Moderate                                 | 4 (3.5)                             | 2 (1.7)                              | 5 (4.2)                              | 1 (0.8)                    |
| Severe                                   | 1 (0.9)                             | 0 (0.0)                              | 0 (0.0)                              | 0 (0.0)                    |

Data are prevalence n (%) from safety analysis set. Severity was assessed and reported by investigator.

Abbreviations: n, number of patients in the specified treatment group; No., number of patients who experienced the event after the first treatment dose; TEAE, treatment emergent adverse events.

**eTable 9. Hypoglycemia events through safety follow-up<sup>a</sup>**

|                                                                     | <b>Tirzepatide 5 mg<br/>n = 116</b> | <b>Tirzepatide 10 mg<br/>n = 119</b> | <b>Tirzepatide 15 mg<br/>n = 120</b> | <b>Placebo<br/>n = 120</b> |
|---------------------------------------------------------------------|-------------------------------------|--------------------------------------|--------------------------------------|----------------------------|
| Severe Hypoglycemia <sup>b</sup>                                    | 0 (0.0)                             | 2 (1.6)                              | 1 (0.8)                              | 0 (0.0)                    |
| Hypoglycemia incidence (blood glucose <54 mg/dL), No. (%)           | 18 (15.5)                           | 23 (19.3)                            | 17 (14.2)                            | 15 (12.5)                  |
| Number of episodes, No.                                             | 61                                  | 49                                   | 41                                   | 44                         |
| Aggregated rate per year, events/patient-year                       | 0.64                                | 0.50                                 | 0.43                                 | 0.44                       |
| Hypoglycemia incidence (blood glucose ≤70 mg/dL), No. (%)           | 70 (60.3)                           | 75 (63.0)                            | 72 (60.0)                            | 73 (60.8)                  |
| Number of episodes, No.                                             | 737                                 | 809                                  | 847                                  | 669                        |
| Aggregated rate per year, events/patient-year                       | 7.73                                | 8.19                                 | 8.79                                 | 6.63                       |
| Nocturnal hypoglycemia incidence (blood glucose <54 mg/dL), No. (%) | 8 (6.9)                             | 4 (3.4)                              | 8 (6.7)                              | 8 (6.7)                    |
| Number of episodes, No.                                             | 25                                  | 4                                    | 17                                   | 23                         |
| Aggregated rate per year, events/patient-year                       | 0.26                                | 0.04                                 | 0.18                                 | 0.23                       |
| Nocturnal hypoglycemia incidence (blood glucose ≤70 mg/dL), No. (%) | 27 (23.3)                           | 28 (23.5)                            | 22 (18.3)                            | 23 (19.2)                  |
| Number of episodes, No.                                             | 140                                 | 87                                   | 192                                  | 131                        |
| Aggregated rate per year, events/patient-year                       | 1.47                                | 0.88                                 | 1.99                                 | 1.30                       |

<sup>a</sup>Data are from safety analysis set excluding hypoglycemic events occurring after initiation of new antihyperglycemic therapy.

<sup>b</sup>Severe hypoglycemic events were defined as episodes with severe cognitive impairment requiring the assistance of another person to actively administer carbohydrate, glucagon, or other resuscitative actions.

Abbreviations: mITT, modified intent-to-treat; n, number of patients in the specified treatment group.

**eTable 10. Malignant neoplasms reported during the study**

| <b>Treatment group</b> | <b>Type of malignant neoplasm</b> | <b>Study day</b> |
|------------------------|-----------------------------------|------------------|
| Tirzepatide 5 mg       | Renal neoplasm                    | Day 192          |
| Tirzepatide 5 mg       | Papillary renal cell carcinoma    | Day 100          |
| Tirzepatide 10 mg      | Uterine cancer                    | Day 141          |
| Placebo                | Transitional cell carcinoma       | Day 110          |
| Placebo                | Basal cell carcinoma              | Day 91           |

**eFigure 1. SURPASS-5 study design**

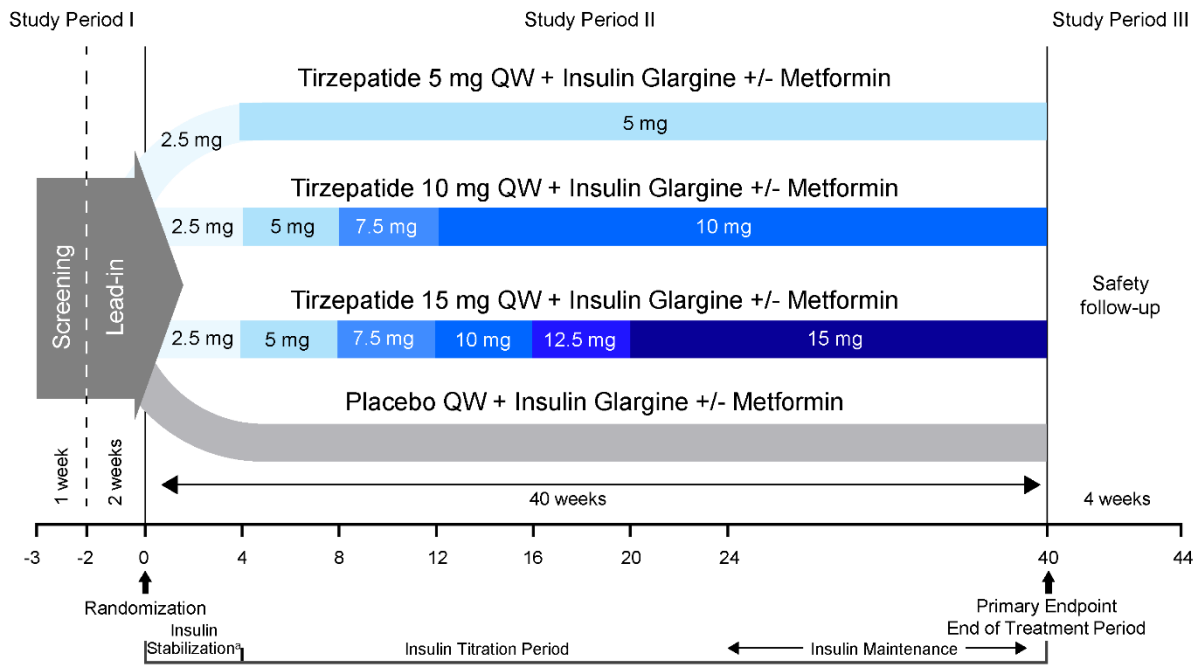

<sup>a</sup>Stabilization period was the first 4 weeks after randomization with restricted insulin dose adjustments. Insulin glargine titration period starts from week 4 to 40 (end of treatment or end of study) with unrestricted insulin dose adjustments. Maintenance period, when insulin glargine dose was expected to be stable, was from week 24 to 40. Abbreviations: QW, once-weekly.

**eFigure 2. Secondary efficacy outcomes from efficacy estimand. (A) HbA<sub>1c</sub> change from baseline at week 40, (B) proportion of patients achieving HbA<sub>1c</sub> levels <7.0%, ≤6.5%, and <5.7% at week 40, (C) proportion of patients achieving body weight loss ≥5%, ≥10% and ≥15% at week 40 (D) mean 7-point SMBG profiles at baseline and at week 40**

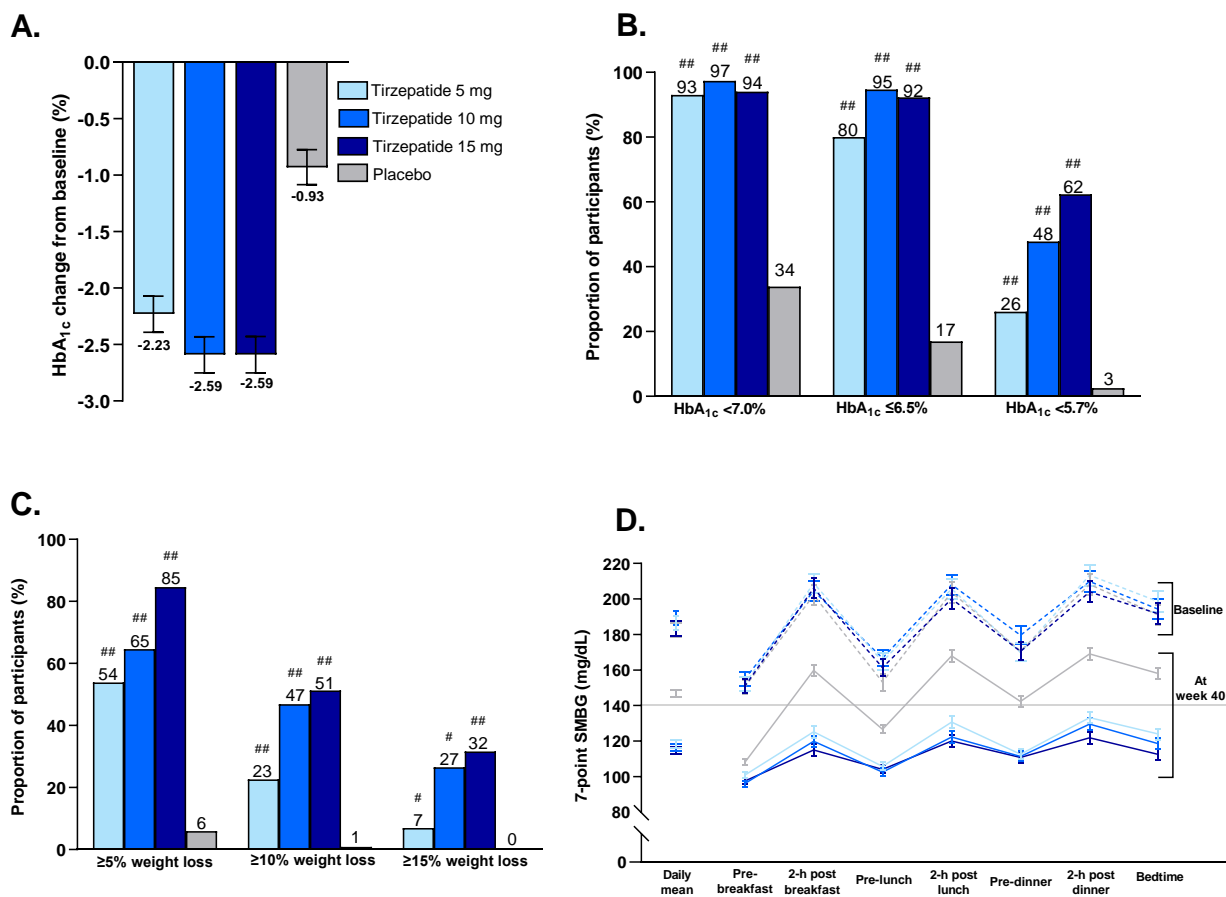

All data reflect efficacy estimand (corresponding analyses used the efficacy analysis set) that evaluated treatment effects using on-treatment data without use of rescue therapy.

Panel A: Mixed-model repeated measures analysis was used with treatment, visit, treatment-by-visit interaction, country, baseline metformin use as fixed effects and baseline HbA<sub>1c</sub> value as a covariate. Error bars represent 95% CI for the estimated mean.

Panel B, C: Logistic regression with the same factor and covariate as Panel A (without interactions) where missing endpoints were dichotomized after they were predicted from the continuous endpoint mixed-model repeated measures analysis in Panel A. #*P* < .05 and ##*P* < .001 vs placebo at Week 40.

Panel D: Values are estimated mean (SE) from analysis of covariance with treatment, country, baseline metformin use, baseline HbA<sub>1c</sub> category (≤8.0%, >8.0%) as fixed effects and baseline value as a covariate.

Abbreviations: SE, standard error; SMBG, self-monitored blood glucose.

**eFigure 3. Efficacy measures (treatment-regimen estimand). (A) body weight change from baseline to week 40; and (B) proportion of patients achieving body weight loss targets  $\geq 5\%$ ,  $\geq 10\%$ , and  $\geq 15\%$  at week 40**

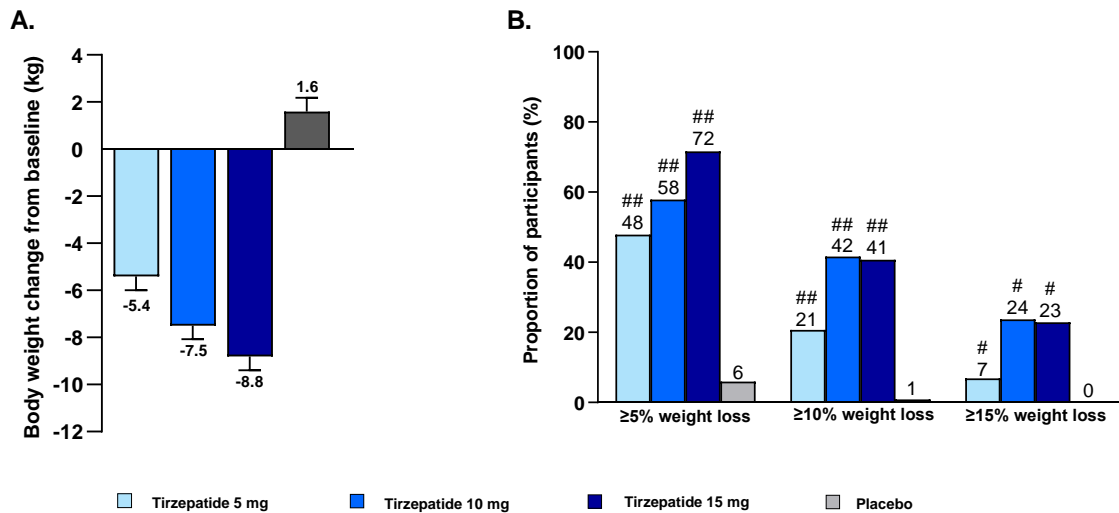

Data reflect treatment-regimen estimand (corresponding analyses used the full analysis set) that evaluated treatment effects regardless of treatment adherence or use of rescue therapy. Missing values at week 40 were imputed 100 times using method of multiple imputation based on the placebo arm.

Panel A: analysis of covariance model was used with treatment, country, baseline metformin use, baseline HbA<sub>1c</sub> category ( $\leq 8.0\%$ ,  $>8.0\%$ ) as fixed effects and baseline weight value as a covariate. Data are presented as estimated mean (SE).

For panel B: logistic regression was used with the same fixed effects and covariate as that for analysis of covariance model. # $P < .05$  and ## $P < .001$  vs placebo at 40 weeks.

Abbreviations: HbA<sub>1c</sub>, glycated hemoglobin A<sub>1c</sub>; SE, standard error.



**eFigure 4. Daily mean insulin glargine dose changes over time. (A) insulin glargine dose (IU/kg/day) percent change from baseline and (B) insulin glargine dose (IU/kg/day) change from baseline**

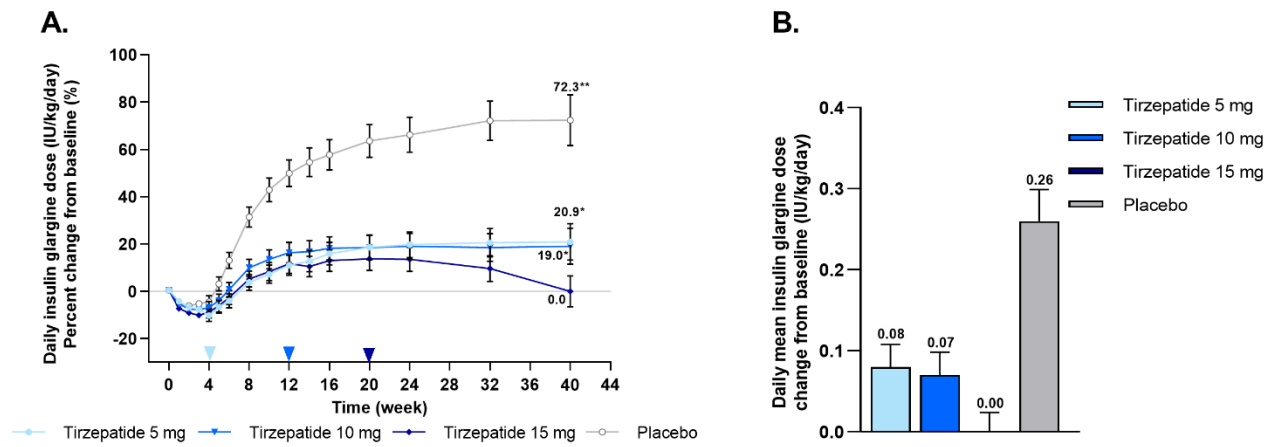

Blue arrows on the X-axis indicate the time points when maintenance doses of tirzepatide 5, 10, and 15 mg were achieved. Error bars represent standard error of the mean. \* $P < .05$  and \*\* $P < .001$  vs baseline at week 40.

Panel A and B reflect efficacy estimand (corresponding analysis used the efficacy analysis set) that evaluated treatment effects using on-treatment data without use of rescue therapy. Mixed-model for repeated measures was used with treatment, visit, treatment-by-visit interaction, country, baseline metformin use, baseline HbA<sub>1c</sub> category ( $\leq 8.0\%$ ,  $> 8.0\%$ ) as fixed effects and baseline insulin dose as a covariate.

Insulin doses were log transformed before analysis to account for their skewed distribution and estimated ratio to baseline were transformed back for interpretation expressed as percent change from baseline to week 40 and change from baseline to week 40.

eFigure 5. Fasting lipid profile at week 40

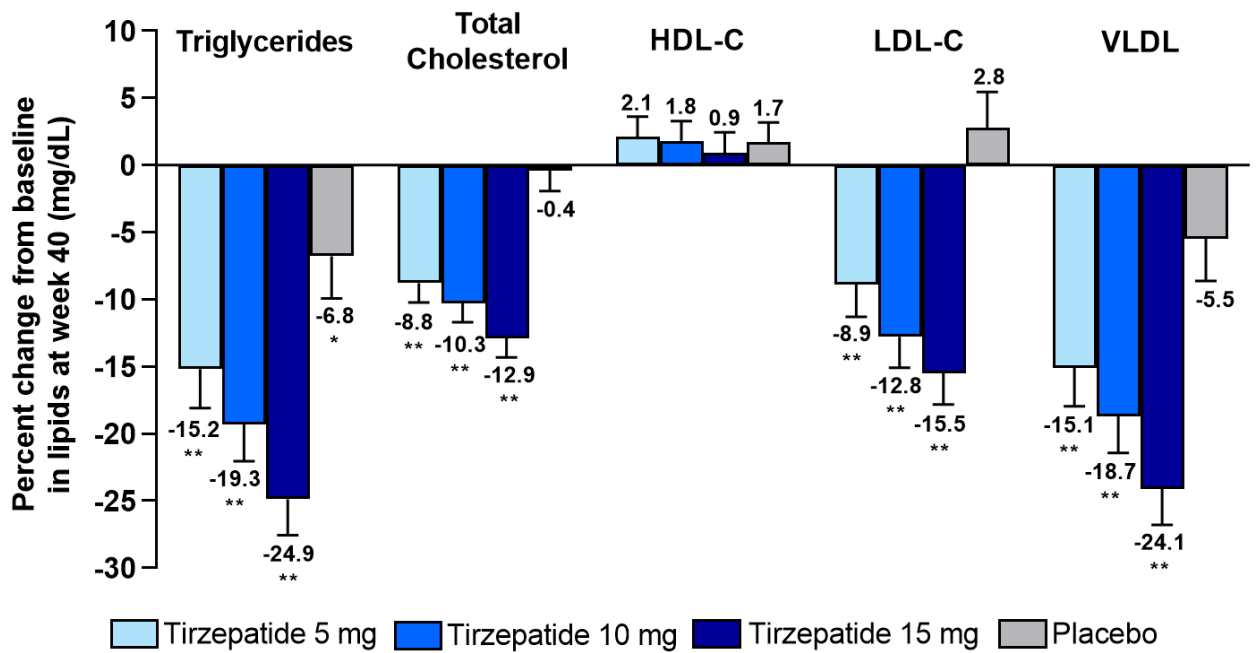

Data reflect efficacy estimand (corresponding analyses used the efficacy analysis set) that evaluated treatment effects using on-treatment data without use of rescue therapy. Values are estimated means (SE) from analysis of covariance of log-transformed data with treatment, country, baseline metformin use, baseline HbA<sub>1c</sub> category ( $\leq 8.0\%$ ,  $>8.0\%$ ) as fixed effects and baseline endpoint value as a covariate. \* $P < .05$  and \*\* $P < .001$  vs baseline at week 40. Abbreviations: HDL-C, high density lipoprotein-cholesterol; LDL-C, low density lipoprotein-cholesterol; SE, standard error; VLDL, very low density lipoprotein.

**eFigure 6. Vital parameters (A) pulse rate (bpm), (B) systolic blood pressure (mmHg), and (C) diastolic blood pressure (mmHg)**

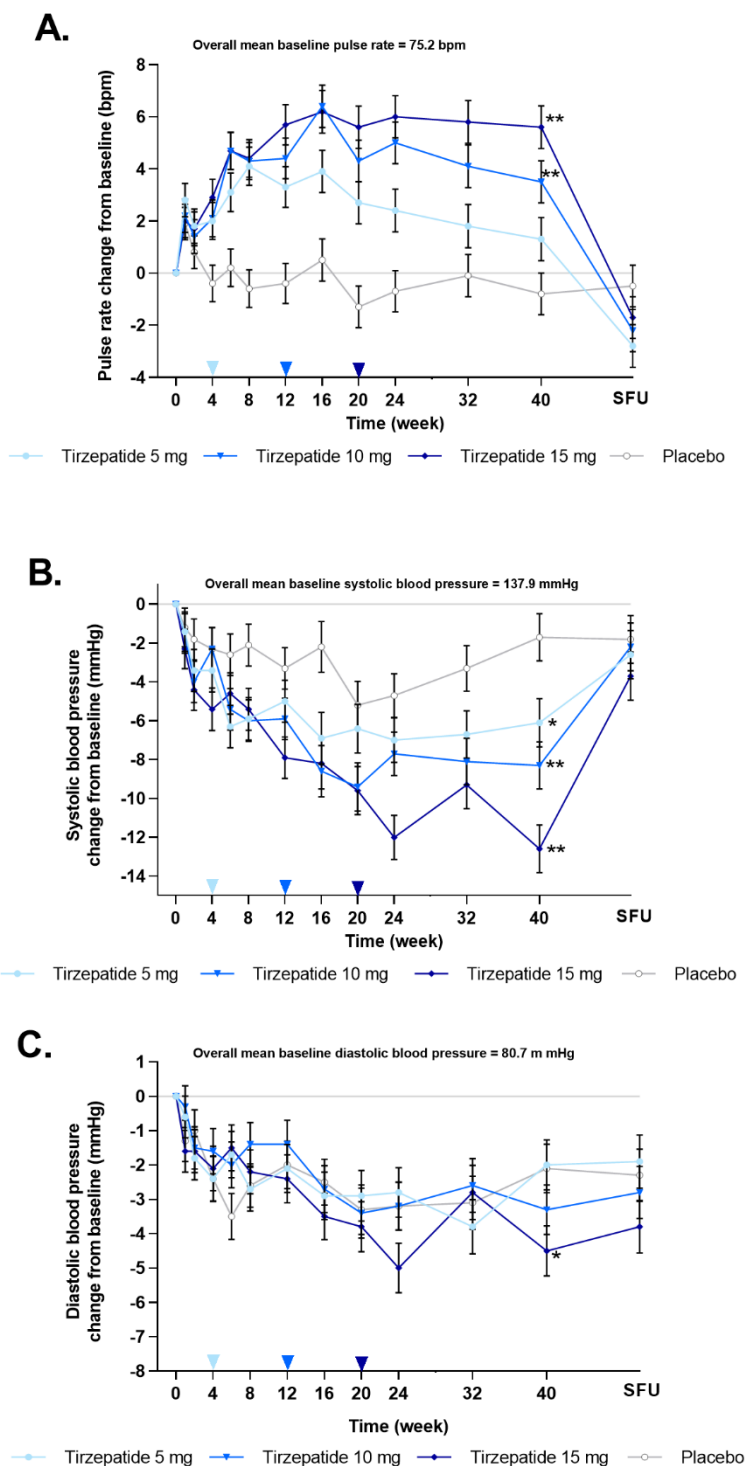

Blue arrows on the X-axis indicate the time points when maintenance dose of tirzepatide 5, 10 and 15 mg were achieved. \*\* $P < .001$  for change difference versus placebo at 40 weeks.

Data are from the safety analysis set and analyzed using mixed-model for repeated measures analysis with treatment, visit, treatment-by-visit interaction, country, baseline metformin use, baseline HbA<sub>1c</sub> category ( $\leq 8.0\%$ ,  $> 8.0\%$ ) as fixed effects and baseline endpoint value as a covariate. Values are estimated means; error bars represent standard error of the mean. Abbreviations: bpm, beats per minute; SE, standard error; SFU, safety follow-up.

eFigure 7. BMI and waist circumference over time and change from baseline

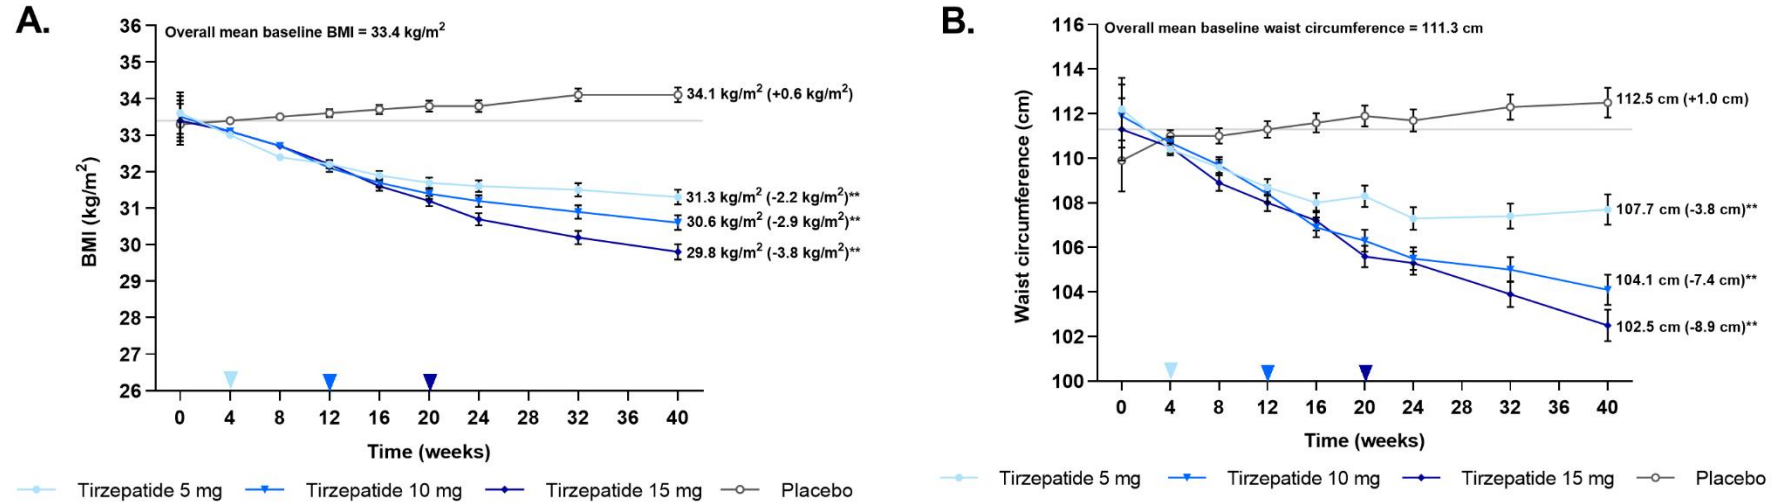

Blue arrows on the X-axis indicate the time points when maintenance dose of tirzepatide 5, 10 and 15 mg were achieved. \*\* $P < .001$  for change difference versus placebo at 40 weeks. Data are from the safety analysis set and calculated using mixed-model for repeated measures analysis with treatment, visit, treatment-by-visit interaction, country, baseline metformin use, baseline HbA<sub>1c</sub> category ( $\leq 8.0\%$ ,  $> 8.0\%$ ) as fixed effects and baseline endpoint value as a covariate. Values are estimated means; error bars represent standard error of the mean; and change in estimated mean values from baseline to 40 weeks are in parentheses.

Abbreviations: BMI, body mass index.

**eFigure 8. Incidence of diarrhea, nausea, and vomiting over time**

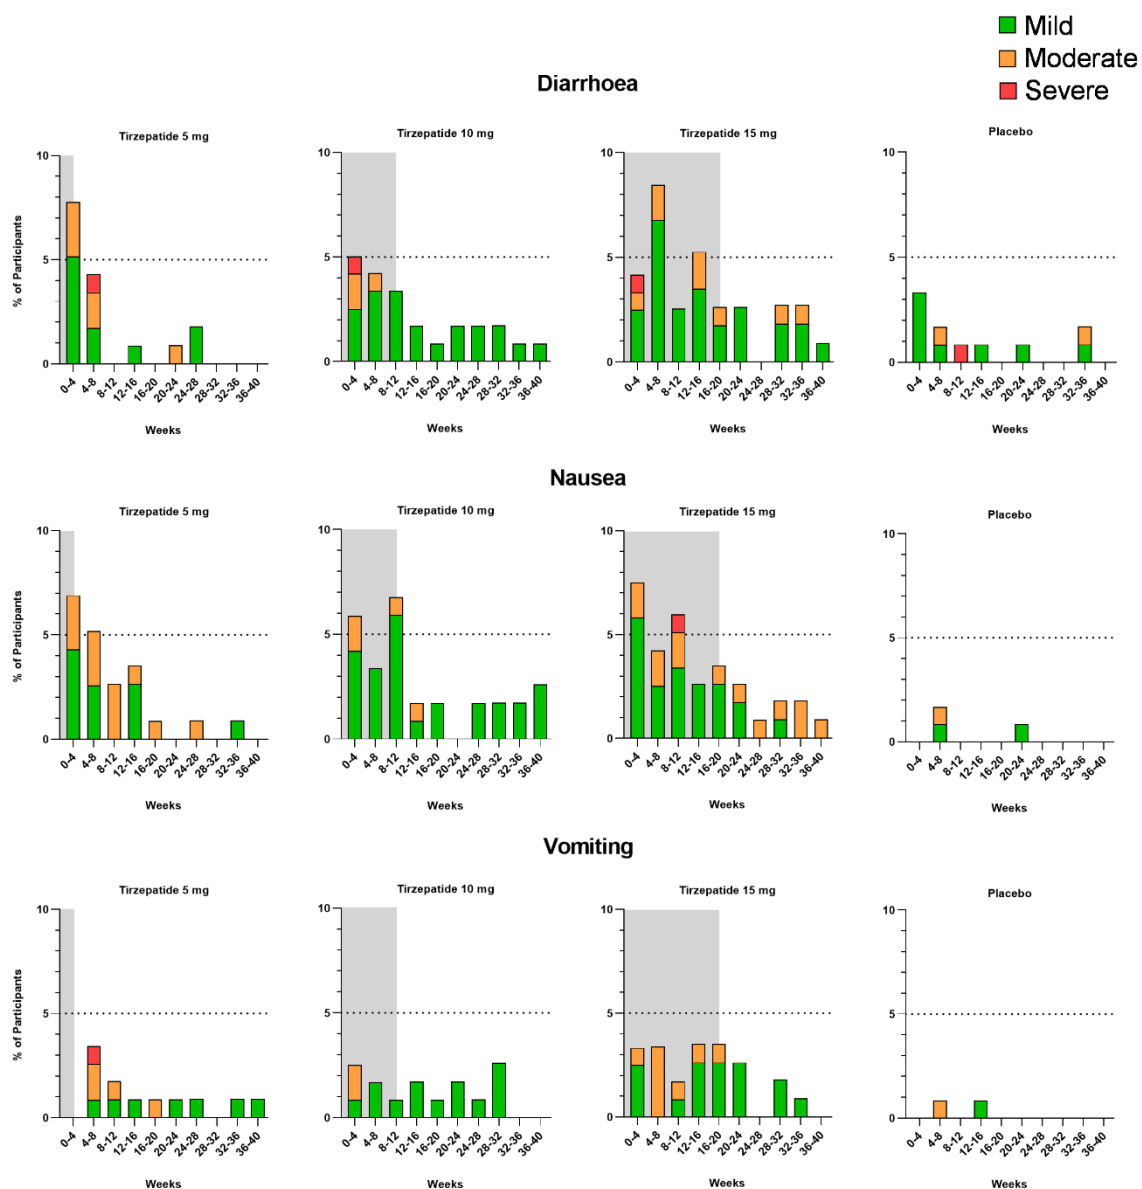

Data are from safety analysis set. Values are percentage of patients who reported a new event during a time interval. Severity was assessed and reported by investigator. The grey shaded area signifies the treatment dose escalation period after which the assigned study treatment dose is reached.

eFigure 9. Prevalence of (A) diarrhea, (B) nausea, and (C) vomiting over time

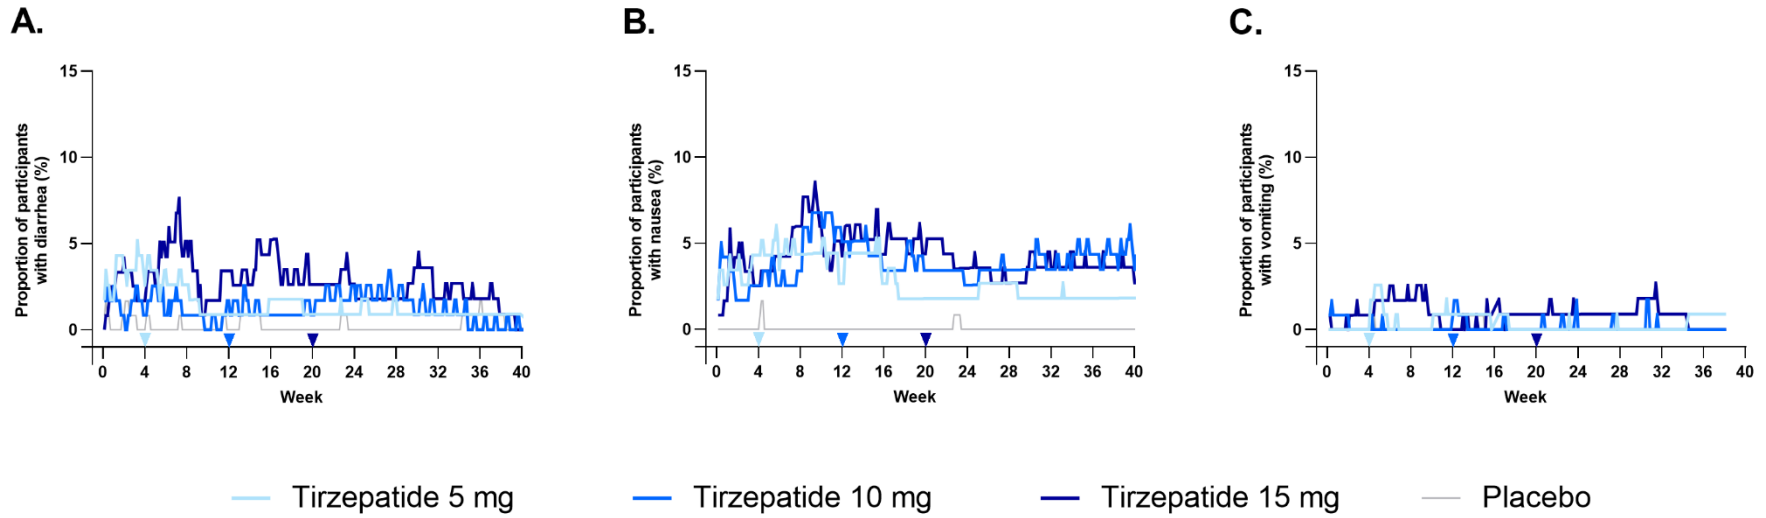

All data are from safety analysis set. Values are percentage of patients who reported an event at a particular time point. Arrows on the x-axis indicate when the assigned treatment dose was reached after dose escalation period for tirzepatide 5 mg, 10 mg, and 15 mg.

## References

1. Rubin DB. Multiple imputation for nonresponse in surveys. New York: John Wiley & Sons Inc.; 1987.
2. Frias JP, Nauck MA, Van J, et al. Efficacy and safety of LY3298176, a novel dual GIP and GLP-1 receptor agonist, in patients with type 2 diabetes: a randomised, placebo-controlled and active comparator-controlled phase 2 trial. *Lancet*. 2018;392(10160):2180-2193. doi:10.1016/s0140-6736(18)32260-8
3. Riddle MC, Rosenstock J, Gerich J. The treat-to-target trial: randomized addition of glargine or human NPH insulin to oral therapy of type 2 diabetic patients. *Diabetes Care*. 2003;26(11):3080-3086. doi:10.2337/diacare.26.11.3080
